# Supplementary material for: Cytotoxic Sesterterpenes from Thai Marine Sponge Hyrtios erectus
Source: MDPI journal article supplement (doi:10.3390/md16120474), 2018-11-28
Supplement: s1 [file s1]

## *Supplementary Materials*

# **Cytotoxic Sesterterpenes from Thai Marine Sponge *Hyrtios erectus***

**Wirongrong Kaweetripob <sup>1</sup>, Chulabhorn Mahidol <sup>1,2</sup>, Pittaya Tuntiwachwuttikul <sup>3</sup>, Somsak Ruchirawat <sup>1,2,4</sup> and Hunsa Prawat <sup>1,\*</sup>**

<sup>1</sup> Chulabhorn Research Institute, Kamphaeng Phet 6 Road, Bangkok 10210, Thailand;  
Kwirongrong@cri.or.th (W.K.); mahidol\_natlab@cri.or.th (C.M.); Somsak@cri.or.th (S.R.)

<sup>2</sup> Chulabhorn Graduate Institute, Chemical Biology Program. Chulabhorn Royal Academy,  
Kamphaeng Phet 6 Road, Bangkok 10210, Thailand

<sup>3</sup> Laboratory of Natural Products Chemistry, Faculty of Science and Technology,  
Phuket Rajabhat University, Phuket 83000, Thailand; pittaya\_tun@yahoo.co.th

<sup>4</sup> Center of Excellence on Environmental Health and Toxicology (EHT), CHE, Ministry of Education, Bangkok  
10210, Thailand

\* Correspondence: hunsa@cri.or.th; Tel.: +66-2-553-8982

# List of Supplementary Materials

- Figure S1.  $^1\text{H}$  NMR spectrum (600 MHz) of compound **1** in  $\text{C}_6\text{D}_6$
- Figure S2.  $^{13}\text{C}$  NMR spectrum (150 MHz) of compound **1** in  $\text{C}_6\text{D}_6$
- Figure S3. HSQC spectrum of compound **1** in  $\text{C}_6\text{D}_6$
- Figure S4. HMBC spectrum of compound **1** in  $\text{C}_6\text{D}_6$
- Figure S5.  $^1\text{H}$  NMR spectrum (600 MHz) of compound **2** in  $\text{CDCl}_3$
- Figure S6.  $^1\text{H}$  NMR spectrum (600 MHz) of compound **2** in  $\text{C}_6\text{D}_6$
- Figure S7.  $^{13}\text{C}$  NMR spectrum (150 MHz) of compound **2** in  $\text{CDCl}_3$
- Figure S8.  $^{13}\text{C}$  NMR spectrum (150 MHz) of compound **2** in  $\text{C}_6\text{D}_6$
- Figure S9. HSQC spectrum of compound **2** in  $\text{CDCl}_3$
- Figure S10. HSQC spectrum of compound **2** in  $\text{C}_6\text{D}_6$
- Figure S11. HMBC spectrum of compound **2** in  $\text{CDCl}_3$
- Figure S12. HMBC spectrum of compound **2** in  $\text{C}_6\text{D}_6$
- Figure S13.  $^1\text{H}$  NMR spectrum (600 MHz) of compound **3** in  $\text{CDCl}_3$
- Figure S14.  $^{13}\text{C}$  NMR spectrum (150 MHz) of compound **3** in  $\text{CDCl}_3$
- Figure S15. HSQC spectrum of compound **3** in  $\text{CDCl}_3$
- Figure S16. HMBC spectrum of compound **3** in  $\text{CDCl}_3$
- Figure S17.  $^1\text{H}$  NMR spectrum (600 MHz) of compound **4** in  $\text{CDCl}_3$
- Figure S18.  $^{13}\text{C}$  NMR spectrum (150 MHz) of compound **4** in  $\text{CDCl}_3$
- Figure S19. HMQC spectrum of compound **4** in  $\text{CDCl}_3$
- Figure S20. HMBC spectrum of compound **4** in  $\text{CDCl}_3$
- Figure S21.  $^1\text{H}$  NMR spectrum (600 MHz) of compound **5** in  $\text{CDCl}_3$
- Figure S22.  $^{13}\text{C}$  NMR spectrum (150 MHz) of compound **5** in  $\text{CDCl}_3$
- Figure S23. HSQC spectrum of compound **5** in  $\text{CDCl}_3$
- Figure S24. HMBC spectrum of compound **5** in  $\text{CDCl}_3$
- Figure S25.  $^1\text{H}$  NMR spectrum (600 MHz) of compound **6** in  $\text{CDCl}_3$
- Figure S26.  $^{13}\text{C}$  NMR spectrum (150 MHz) of compound **6** in  $\text{CDCl}_3$
- Figure S27. HSQC spectrum of compound **6** in  $\text{CDCl}_3$
- Figure S28. HMBC spectrum of compound **6** in  $\text{CDCl}_3$

## Supplementary Material

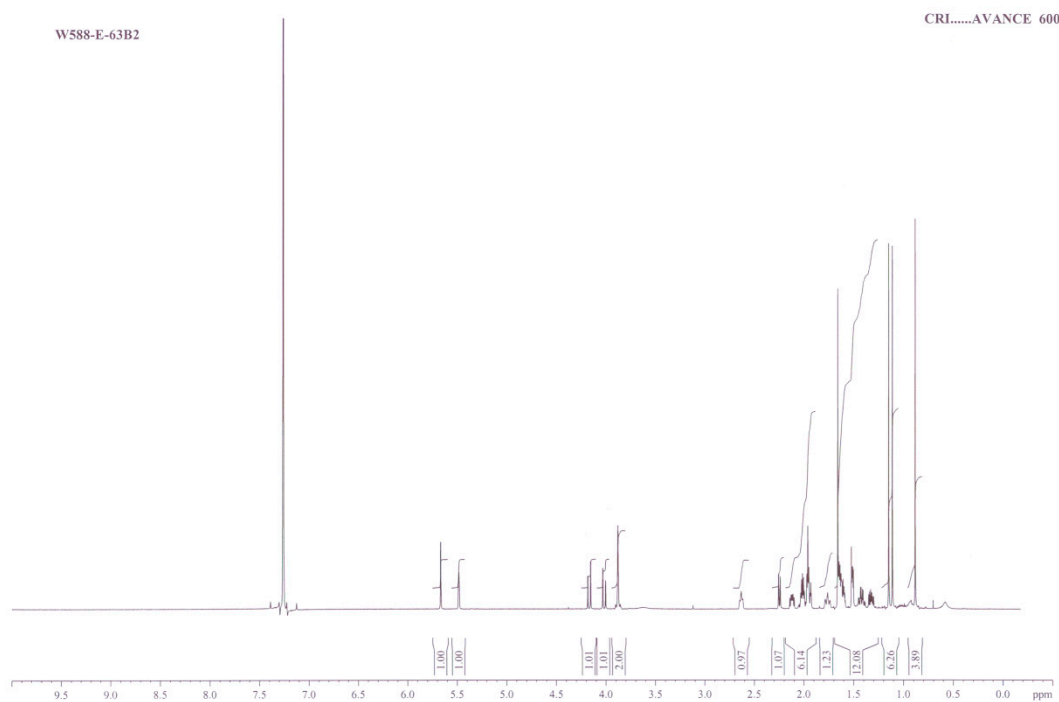

Figure S1.  $^1\text{H}$  NMR spectrum (600 MHz) of compound **1** in  $\text{C}_6\text{D}_6$

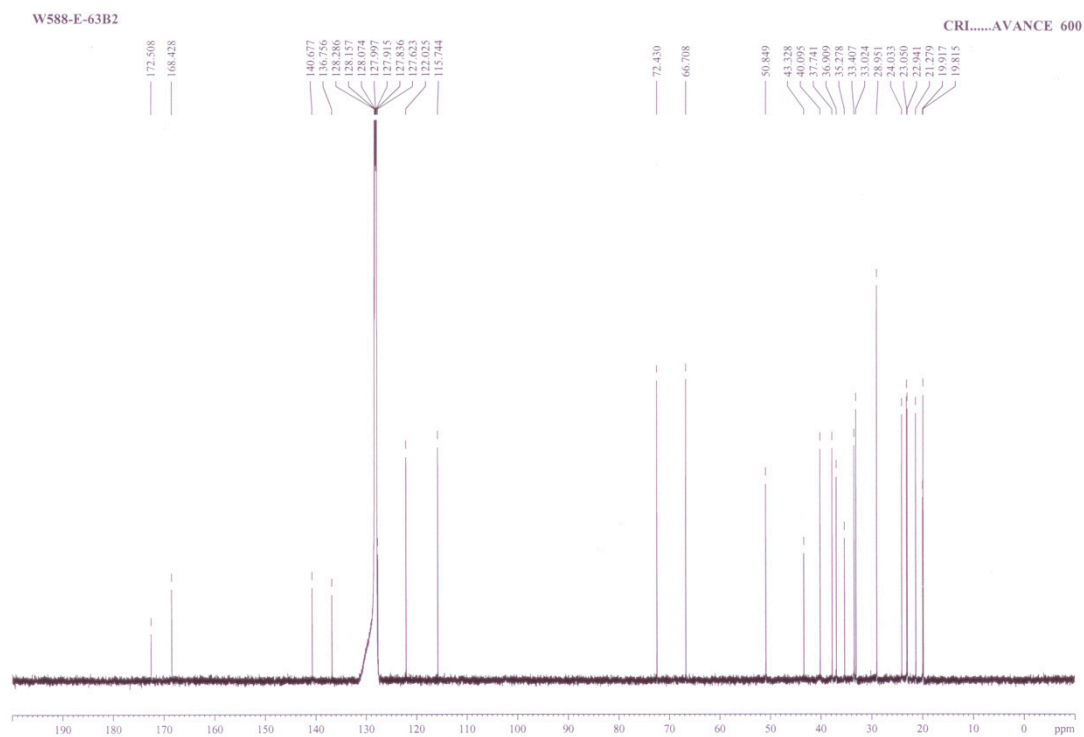

Figure S2.  $^{13}\text{C}$  NMR spectrum (150 MHz) of compound **1** in  $\text{C}_6\text{D}_6$

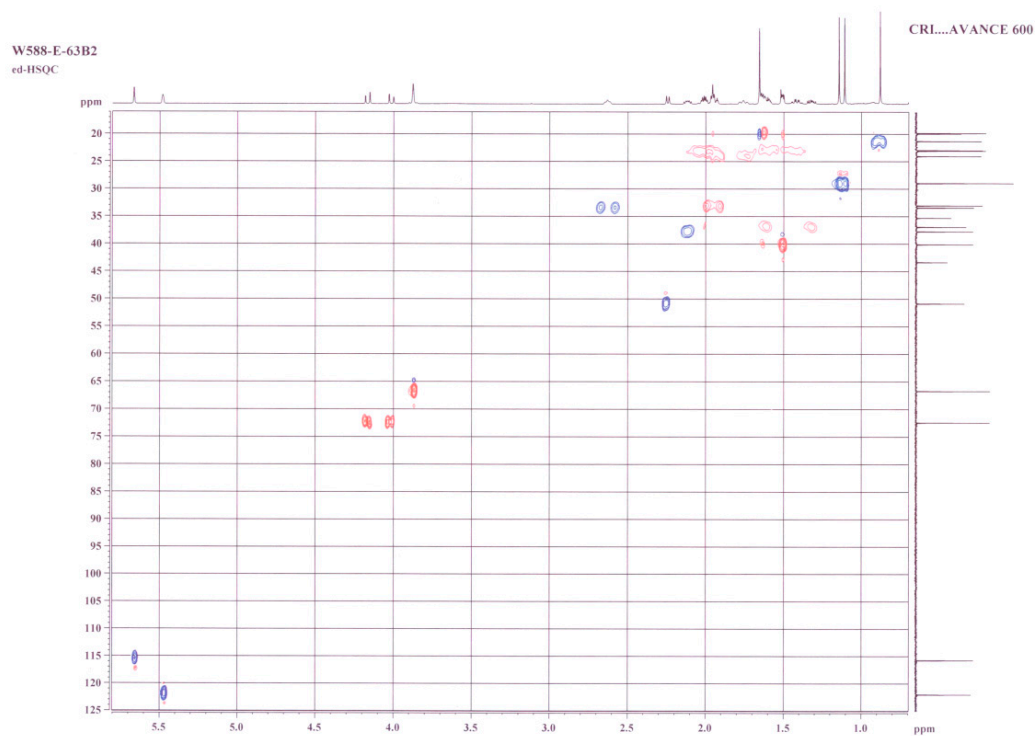

Figure S3. HSQC spectrum of compound **1** in C<sub>6</sub>D<sub>6</sub>

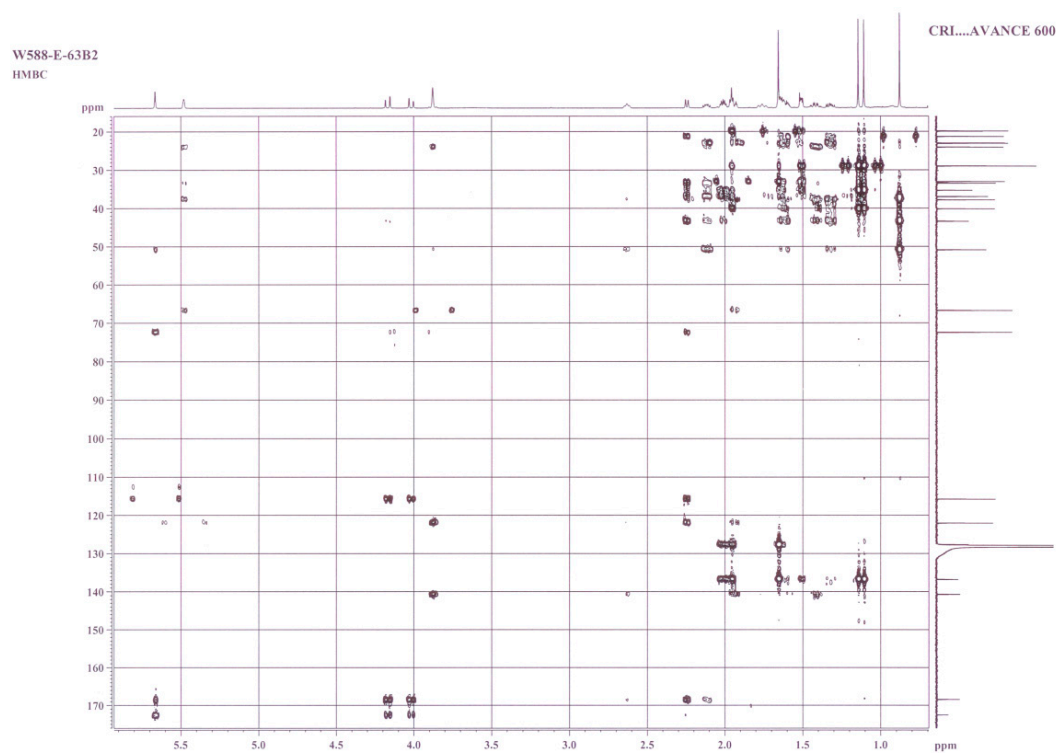

Figure S4. HMBC spectrum of compound **1** in C<sub>6</sub>D<sub>6</sub>



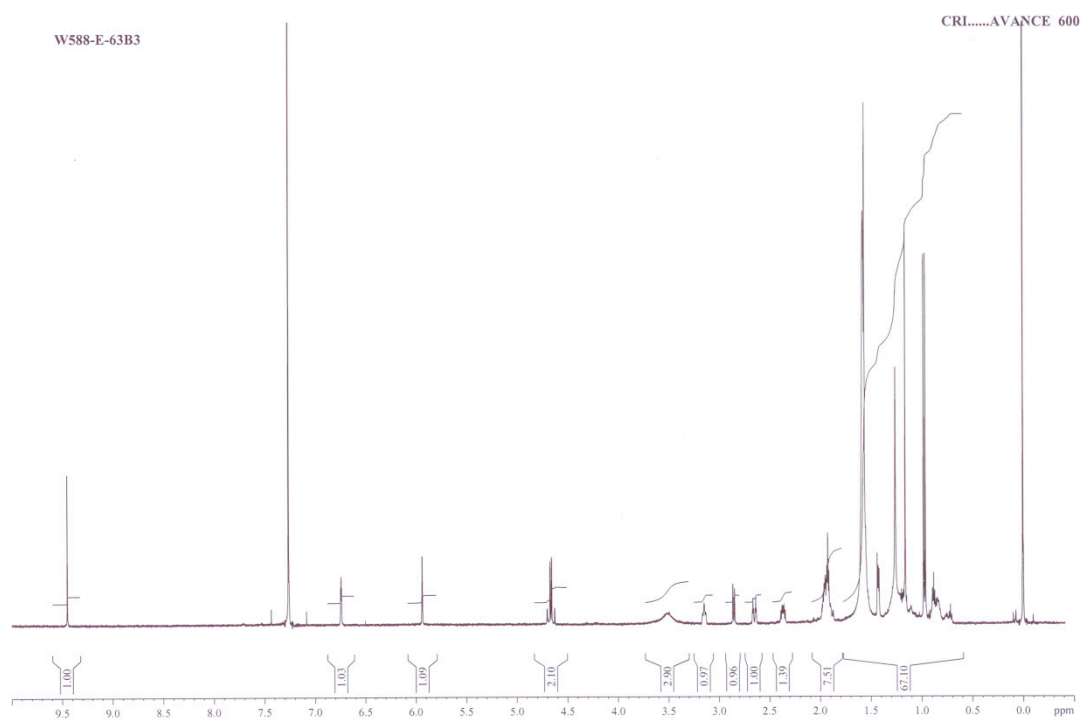

Figure S5.  $^1\text{H}$  NMR spectrum (600 MHz) of compound **2** in  $\text{CDCl}_3$

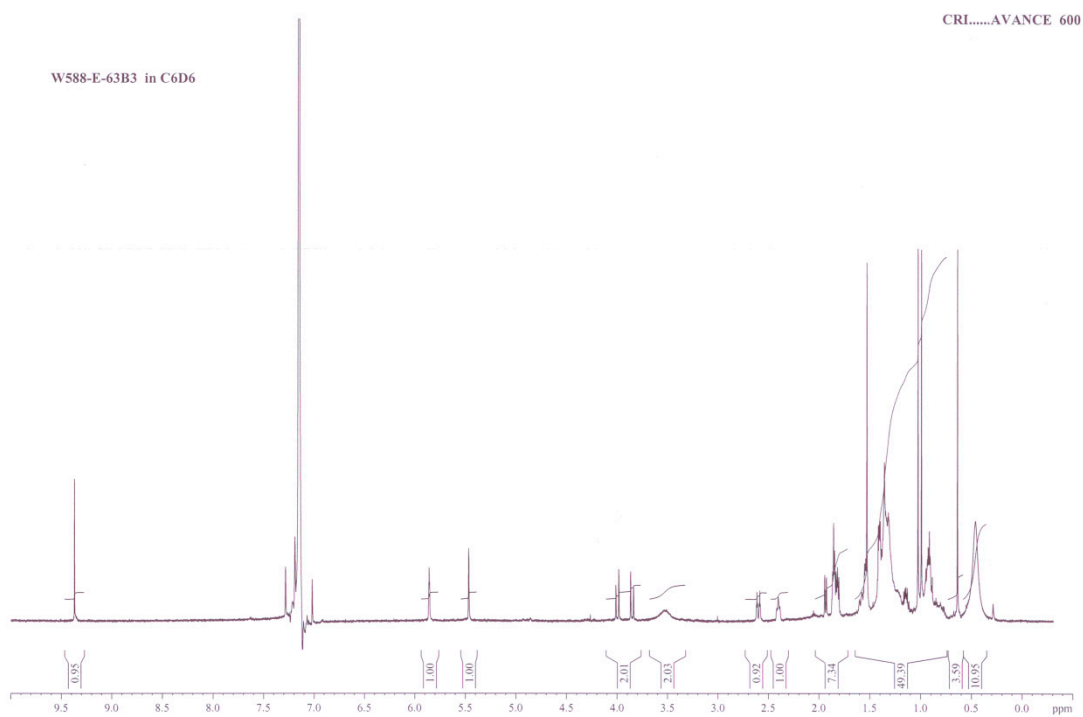

Figure S6.  $^1\text{H}$  NMR spectrum (600 MHz) of compound **2** in  $\text{C}_6\text{D}_6$

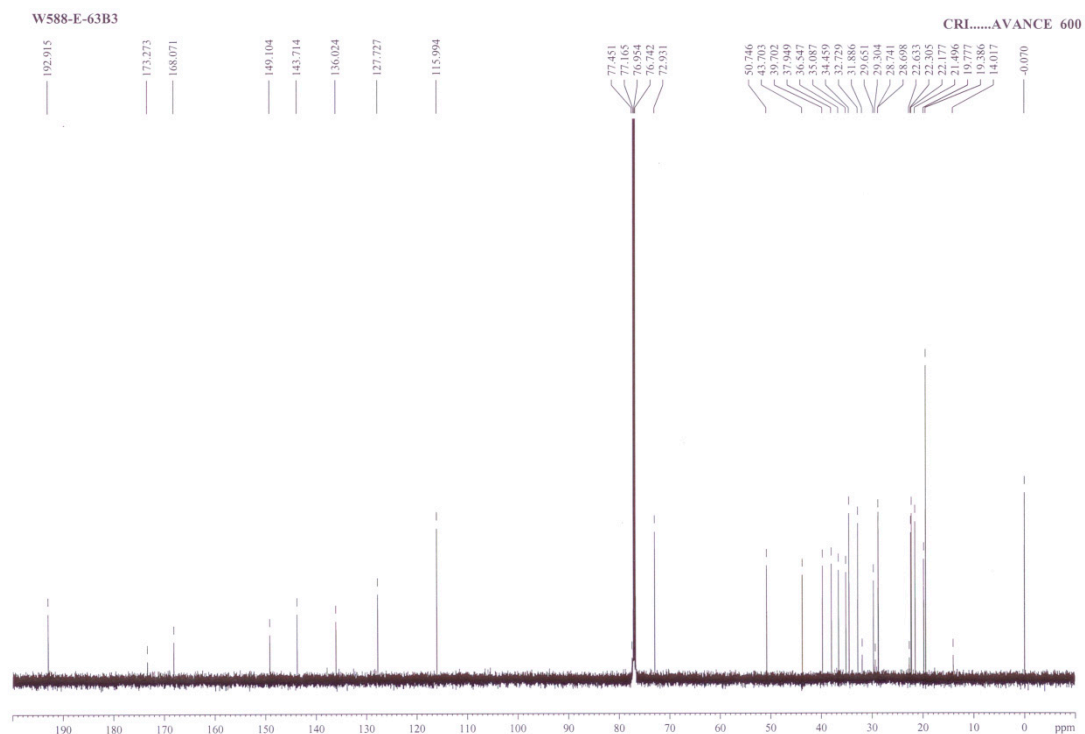

Figure S7.  $^{13}\text{C}$  NMR spectrum (150 MHz) of compound **2** in  $\text{CDCl}_3$

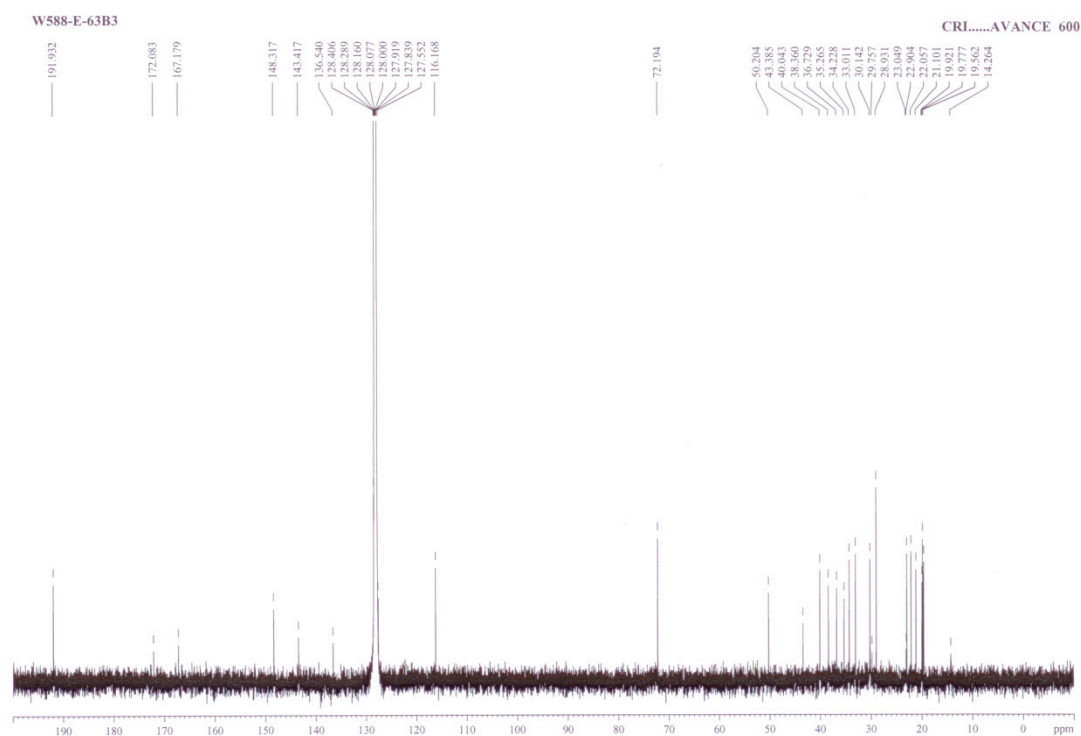

Figure S8.  $^{13}\text{C}$  NMR spectrum (150 MHz) of compound **2** in  $\text{C}_6\text{D}_6$

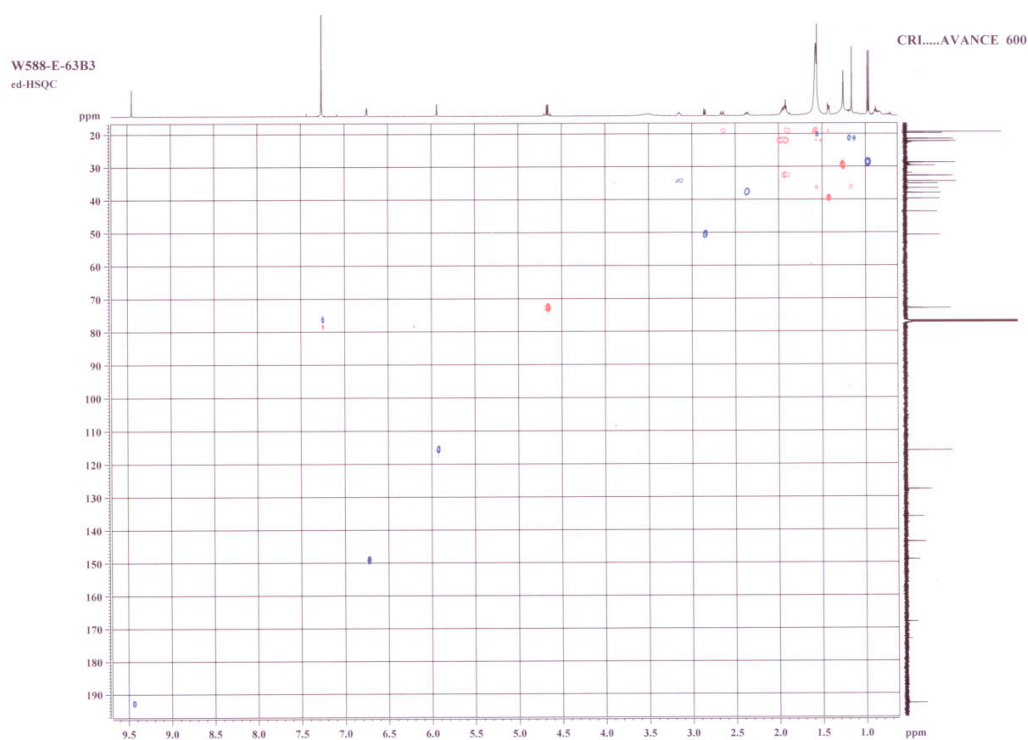

Figure S9. HSQC spectrum of compound **2** in CDCl<sub>3</sub>

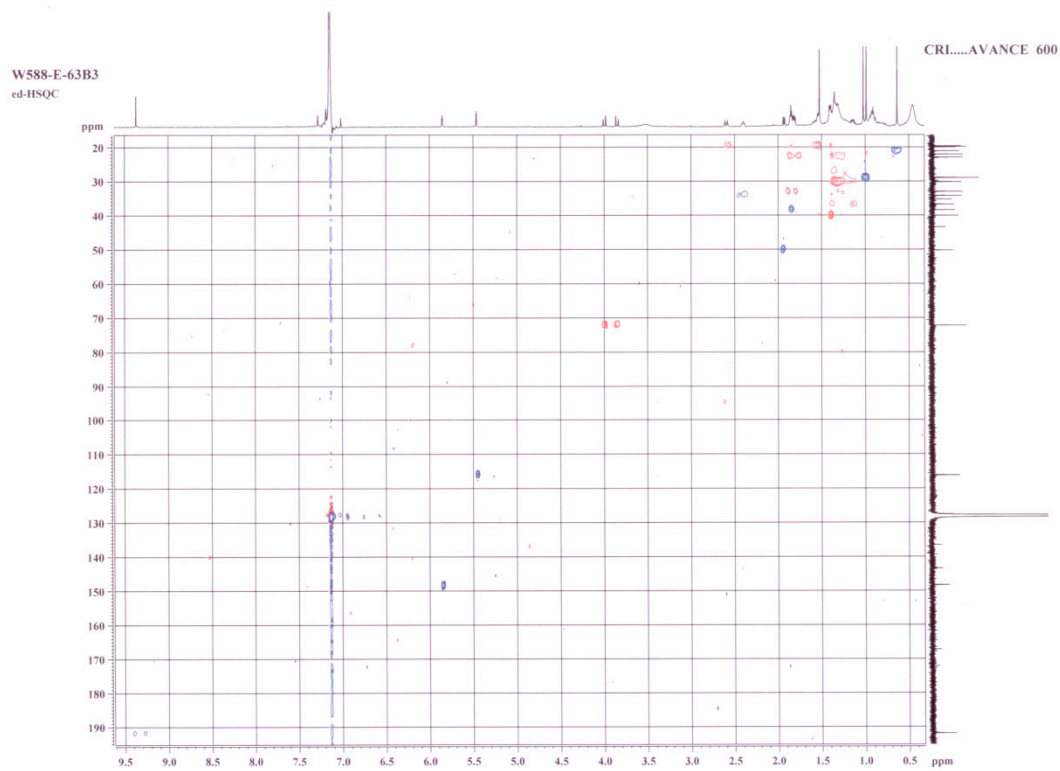

Figure S10. HSQC spectrum of compound **2** in C<sub>6</sub>D<sub>6</sub>

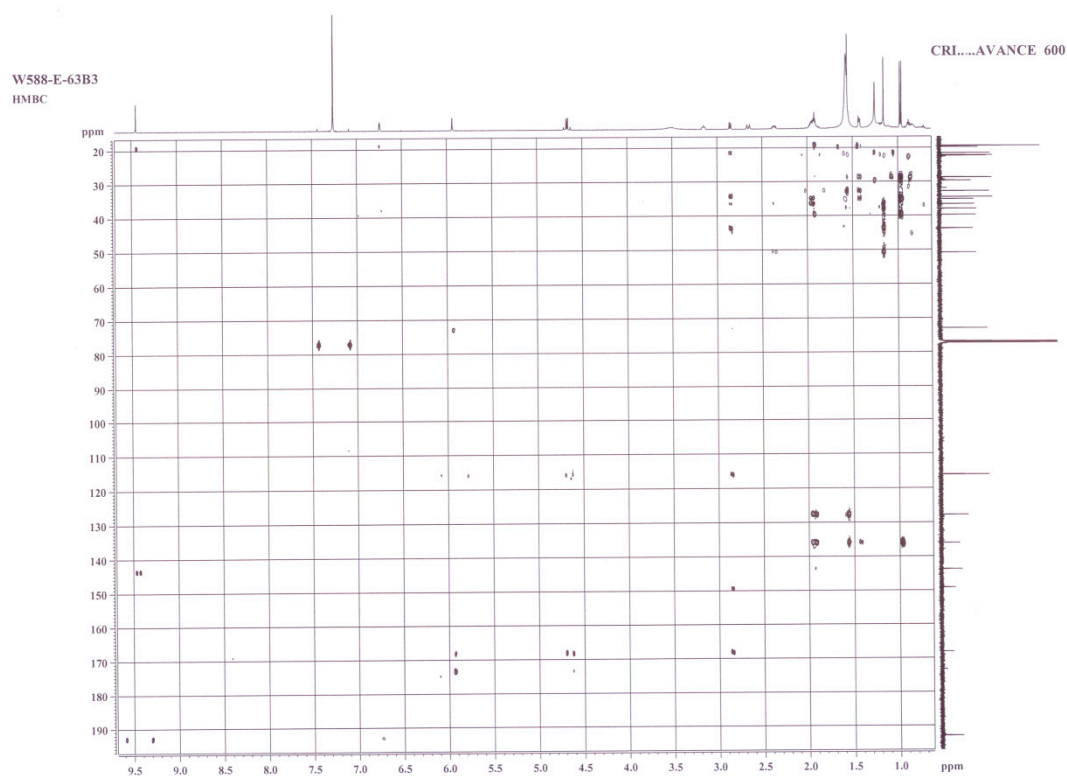

Figure S11. HMBC spectrum of compound **2** in CDCl<sub>3</sub>

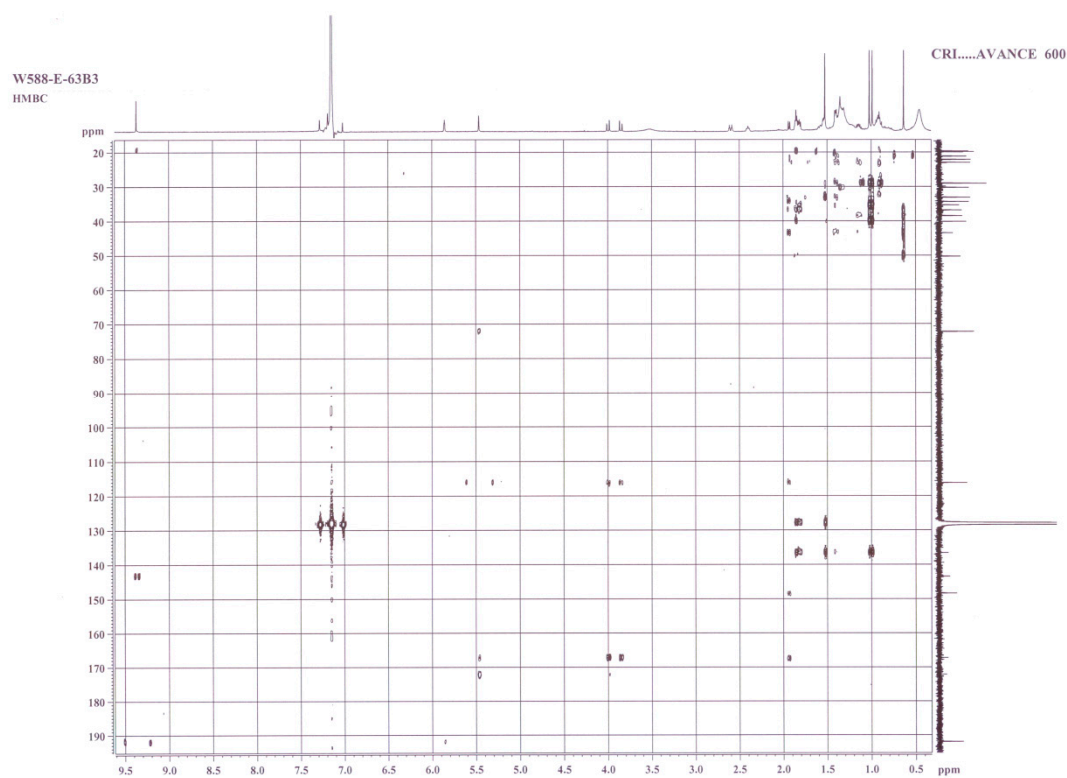

Figure S12. HMBC spectrum of compound **2** in C<sub>6</sub>D<sub>6</sub>

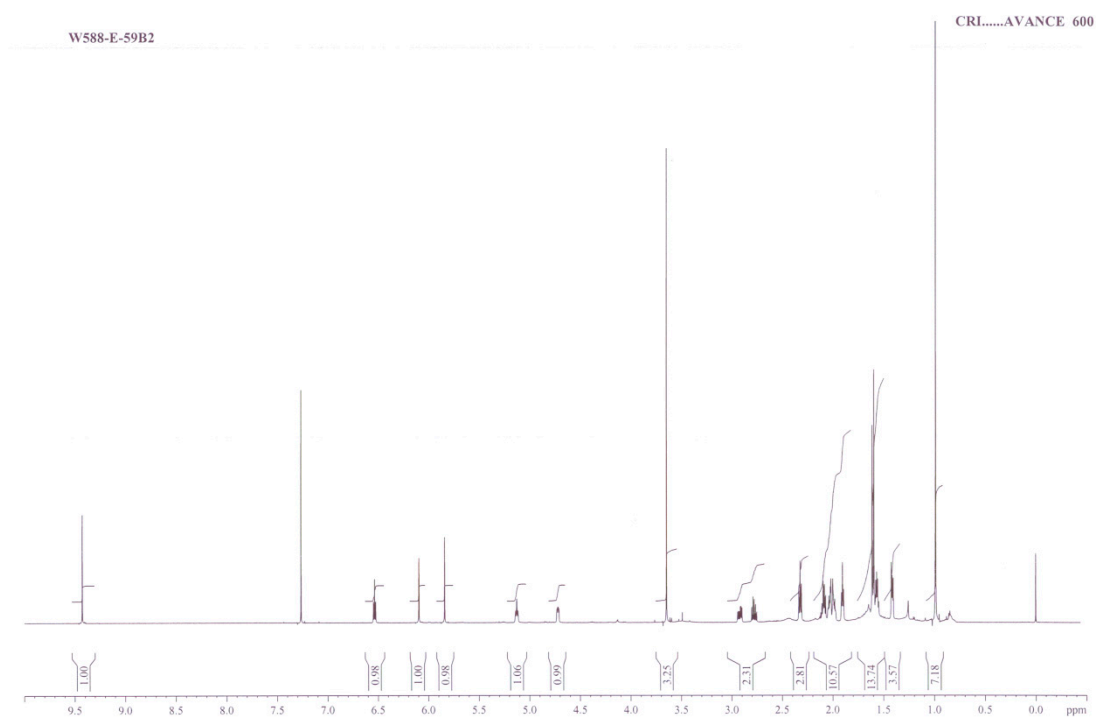

Figure S13.  $^1\text{H}$  NMR spectrum (600 MHz) of compound **3** in  $\text{CDCl}_3$

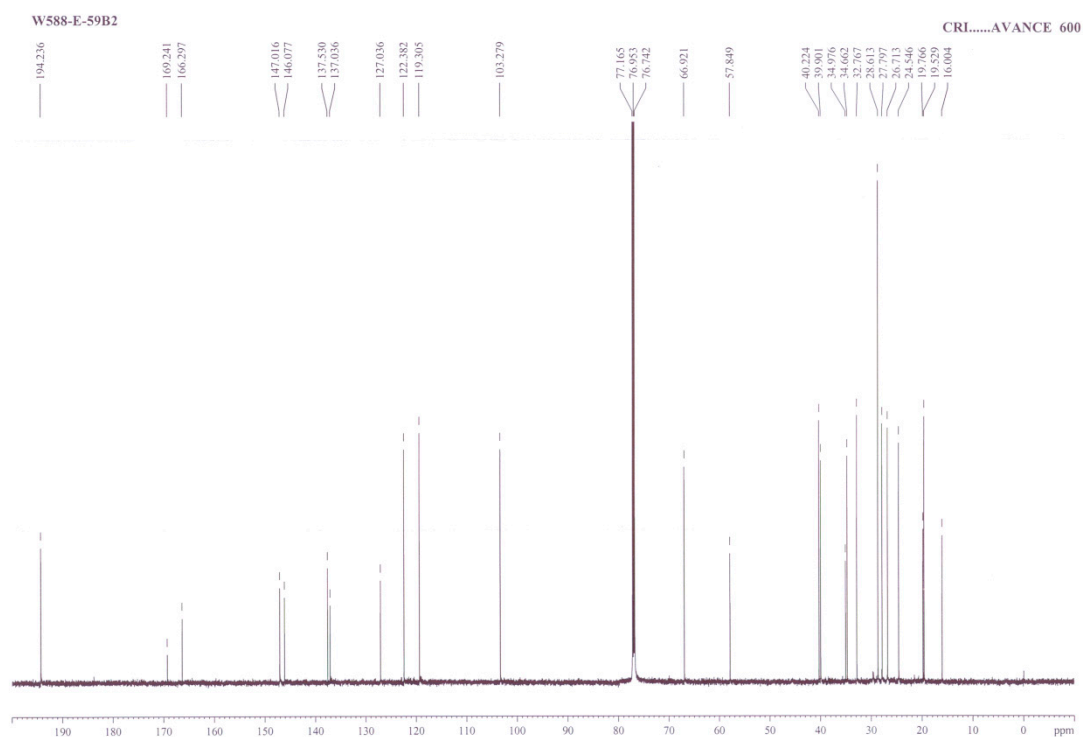

Figure S14.  $^{13}\text{C}$  NMR spectrum (150 MHz) of compound **3** in  $\text{CDCl}_3$

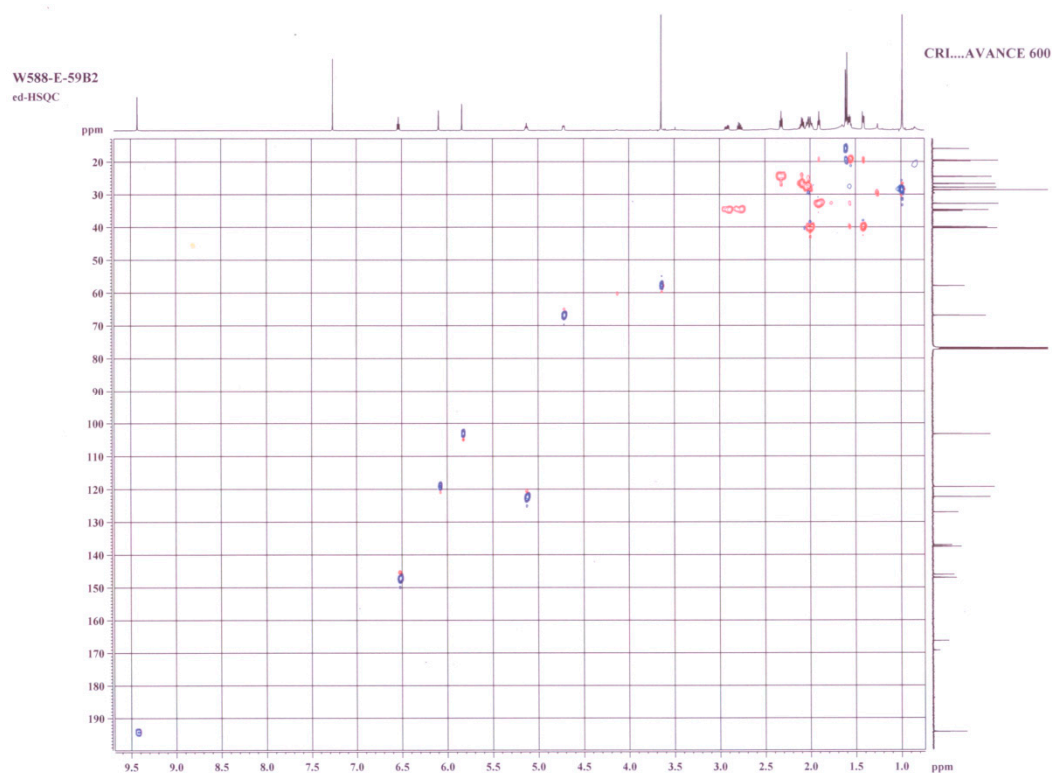

Figure S15. HSQC spectrum of compound **3** in  $\text{CDCl}_3$

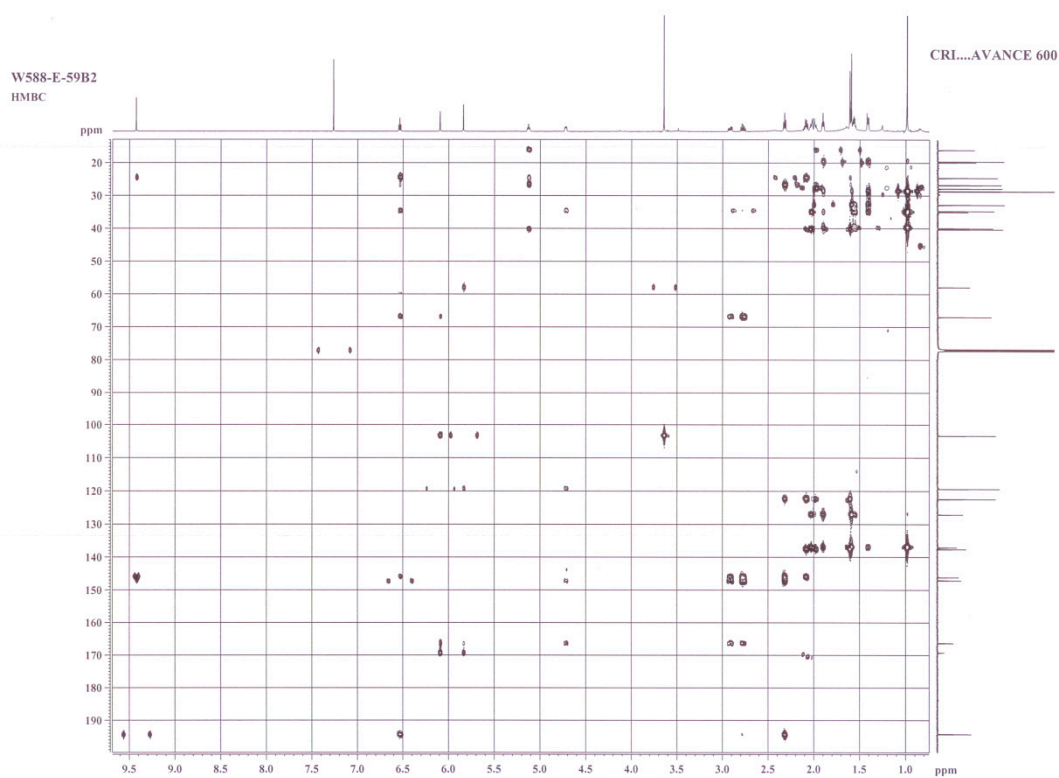

Figure S16. HMBC spectrum of compound **3** in  $\text{CDCl}_3$

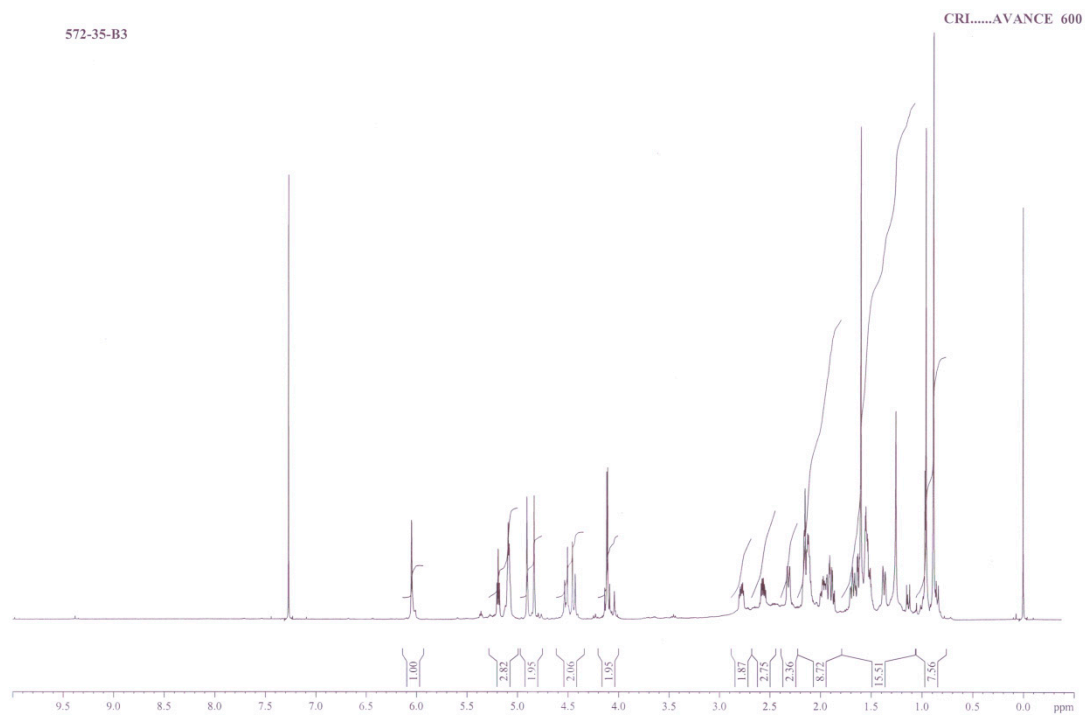

Figure S17.  $^1\text{H}$  NMR spectrum (600 MHz) of compound **4** in  $\text{CDCl}_3$

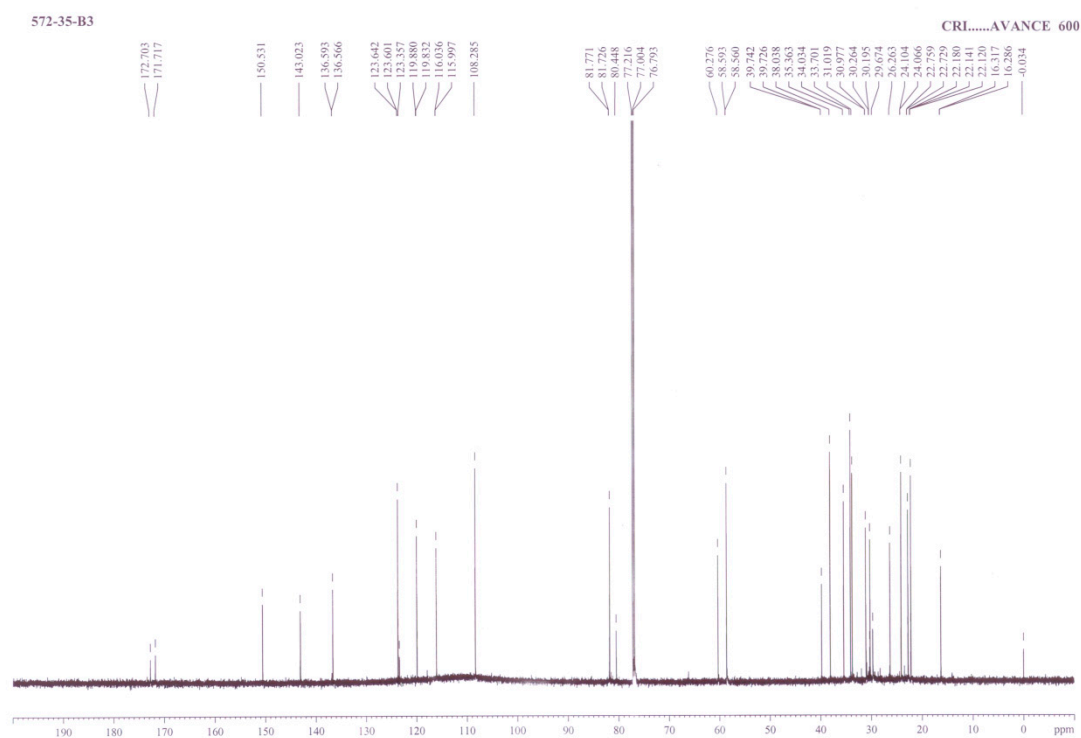

Figure S18.  $^{13}\text{C}$  NMR spectrum (150 MHz) of compound **4** in  $\text{CDCl}_3$



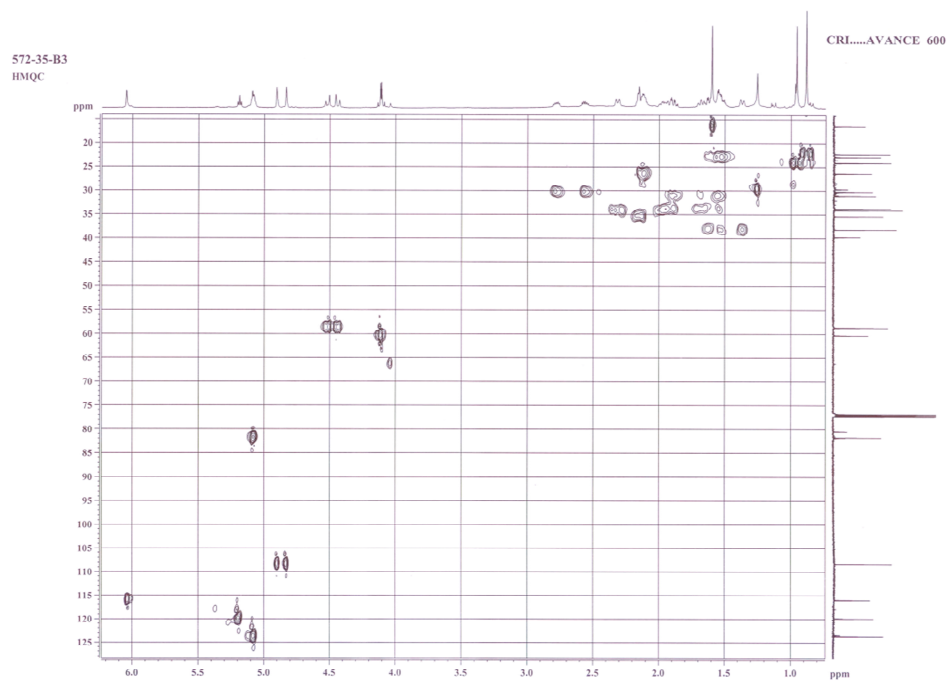

Figure S19. HMQC spectrum of compound **4** in CDCl<sub>3</sub>

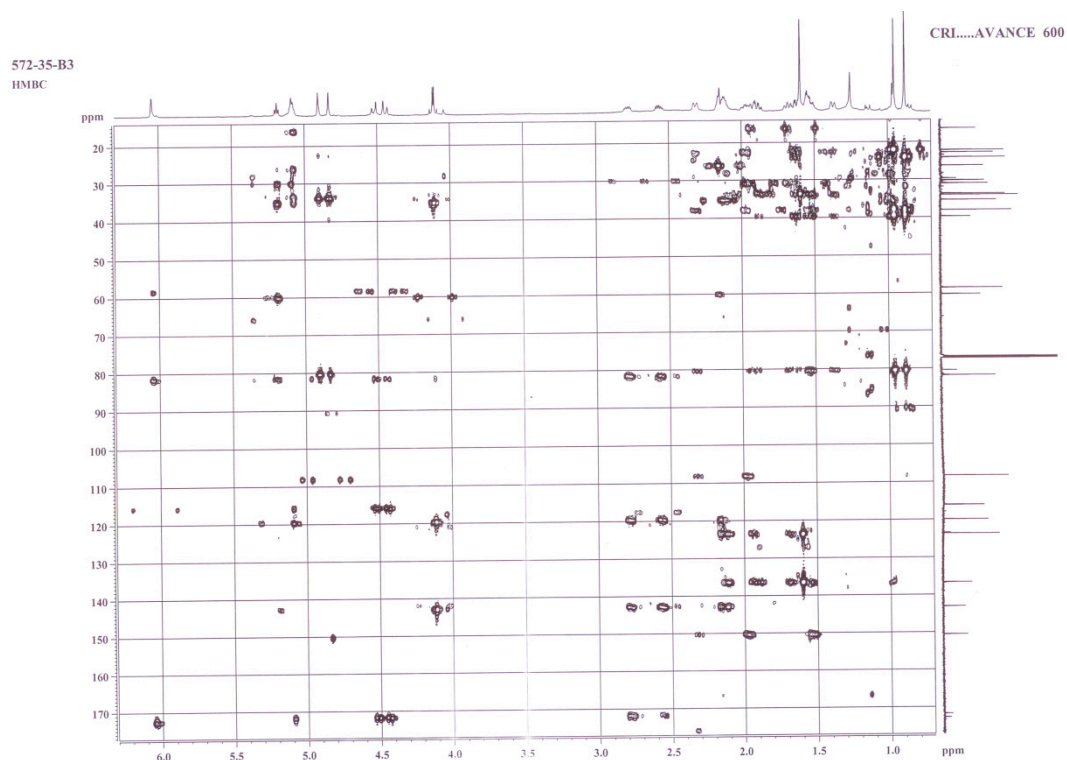

Figure S20. HMBC spectrum of compound **4** in CDCl<sub>3</sub>



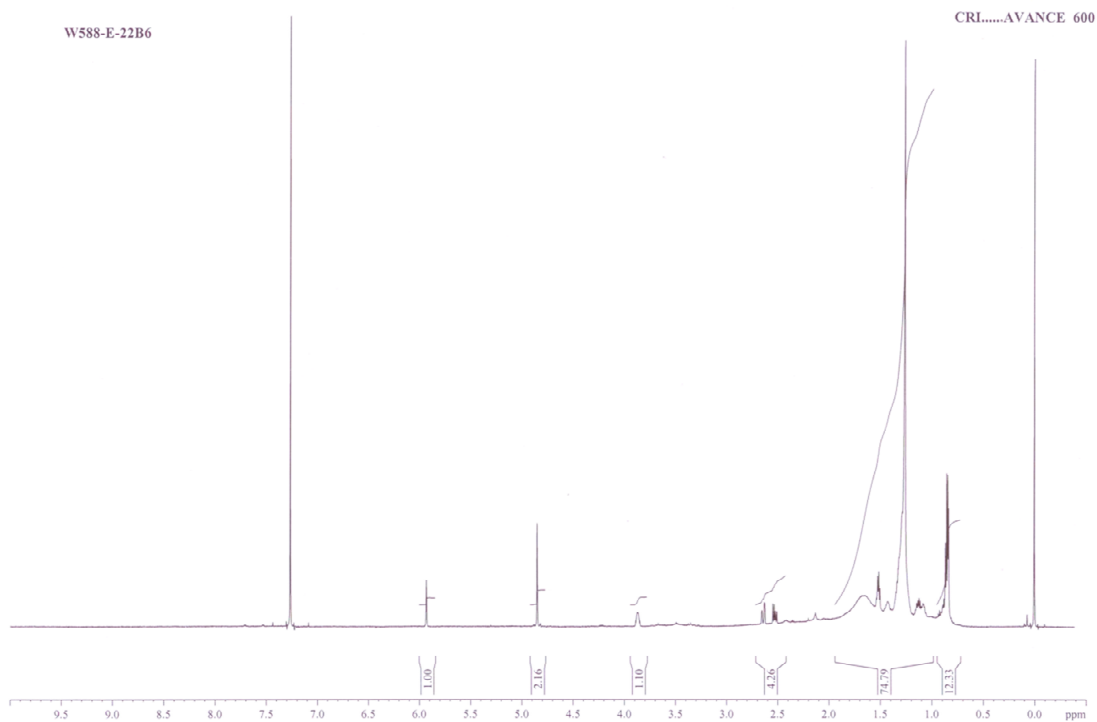

Figure S21.  $^1\text{H}$  NMR spectrum (600 MHz) of compound **5** in  $\text{CDCl}_3$

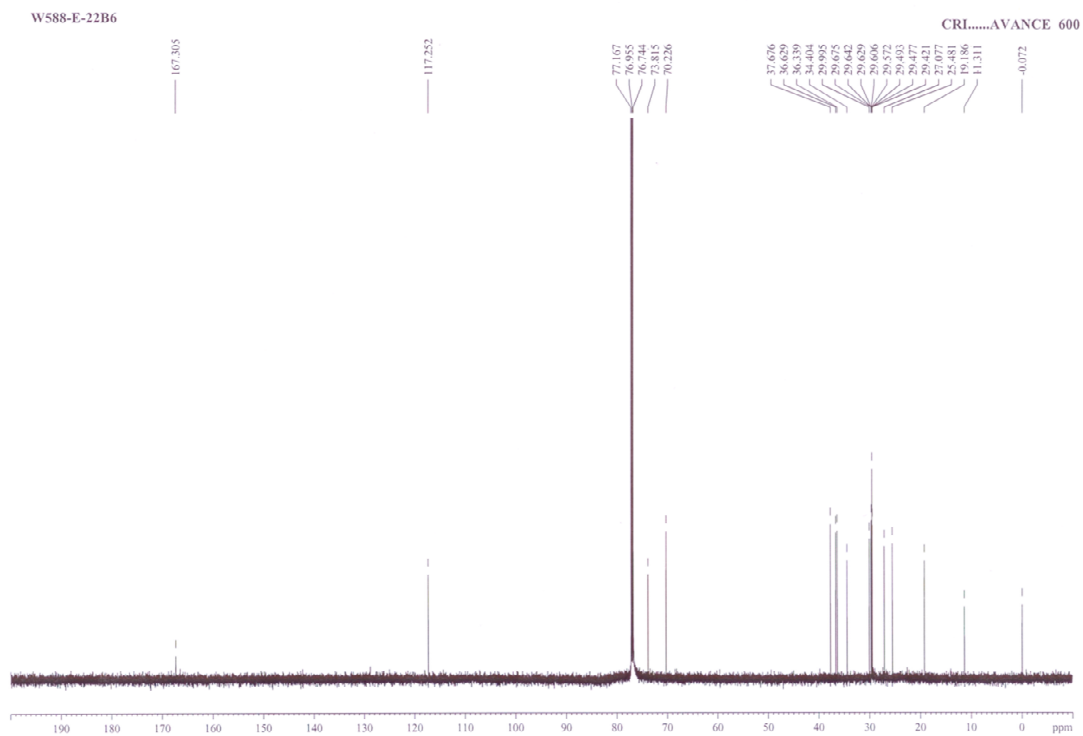

Figure S22.  $^{13}\text{C}$  NMR spectrum (150 MHz) of compound **5** in  $\text{CDCl}_3$

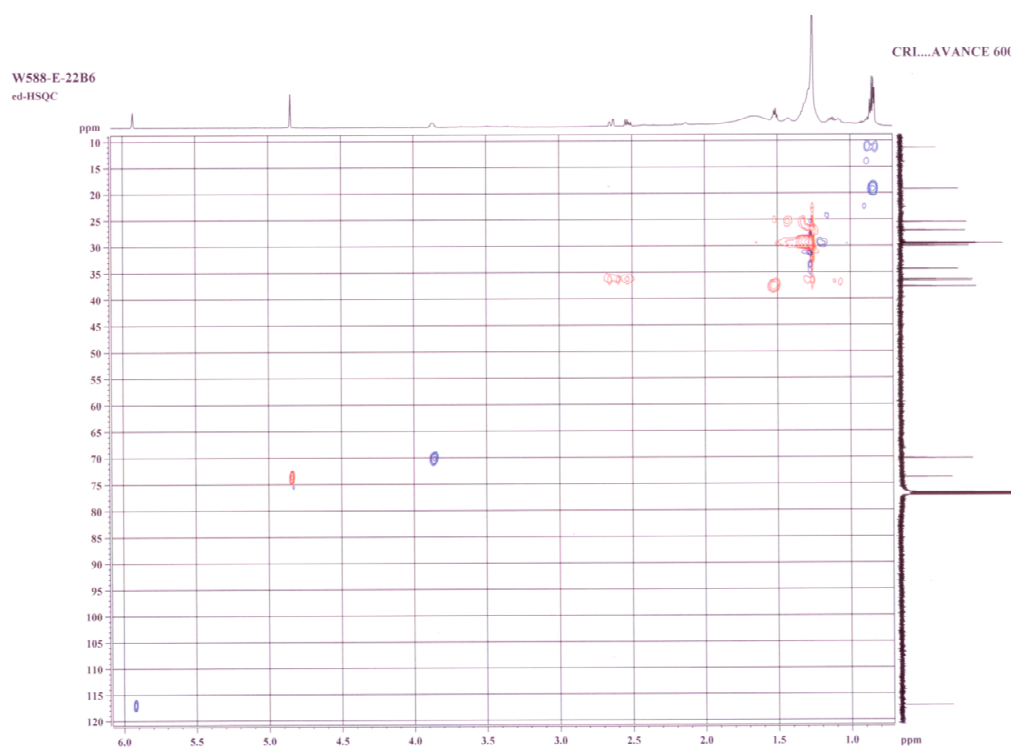

Figure S23. HSQC spectrum of compound **5** in  $\text{CDCl}_3$

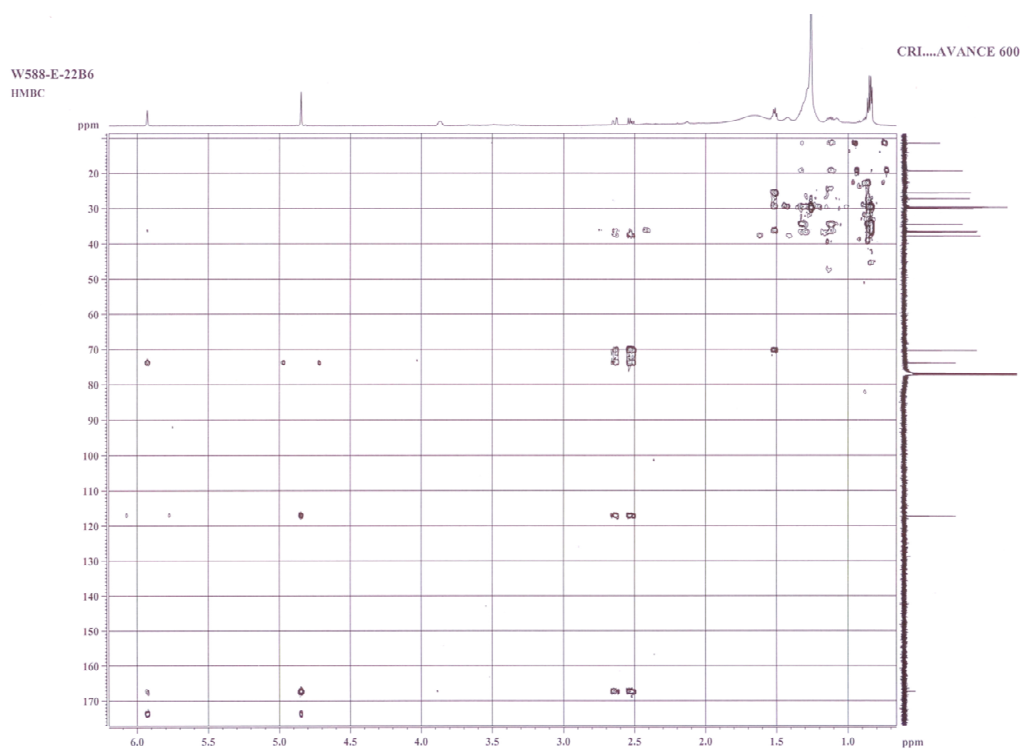

Figure S24. HMBC spectrum of compound **5** in  $\text{CDCl}_3$

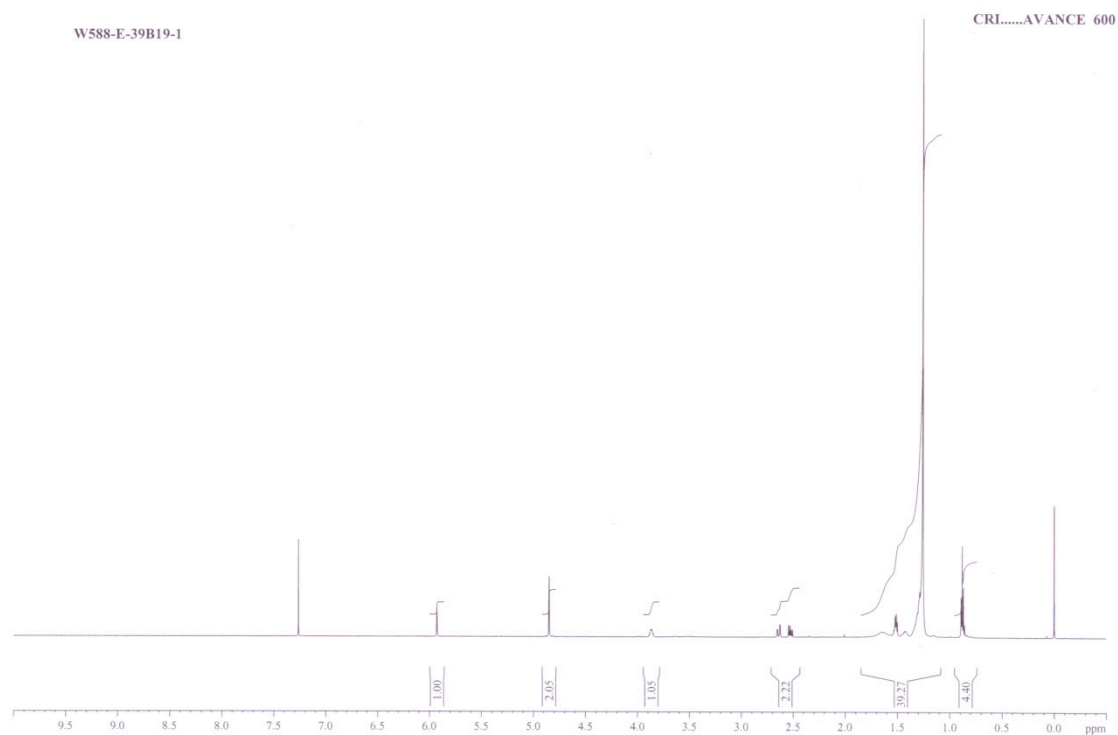

Figure S25.  $^1\text{H}$  NMR spectrum (600 MHz) of compound **6** in  $\text{CDCl}_3$

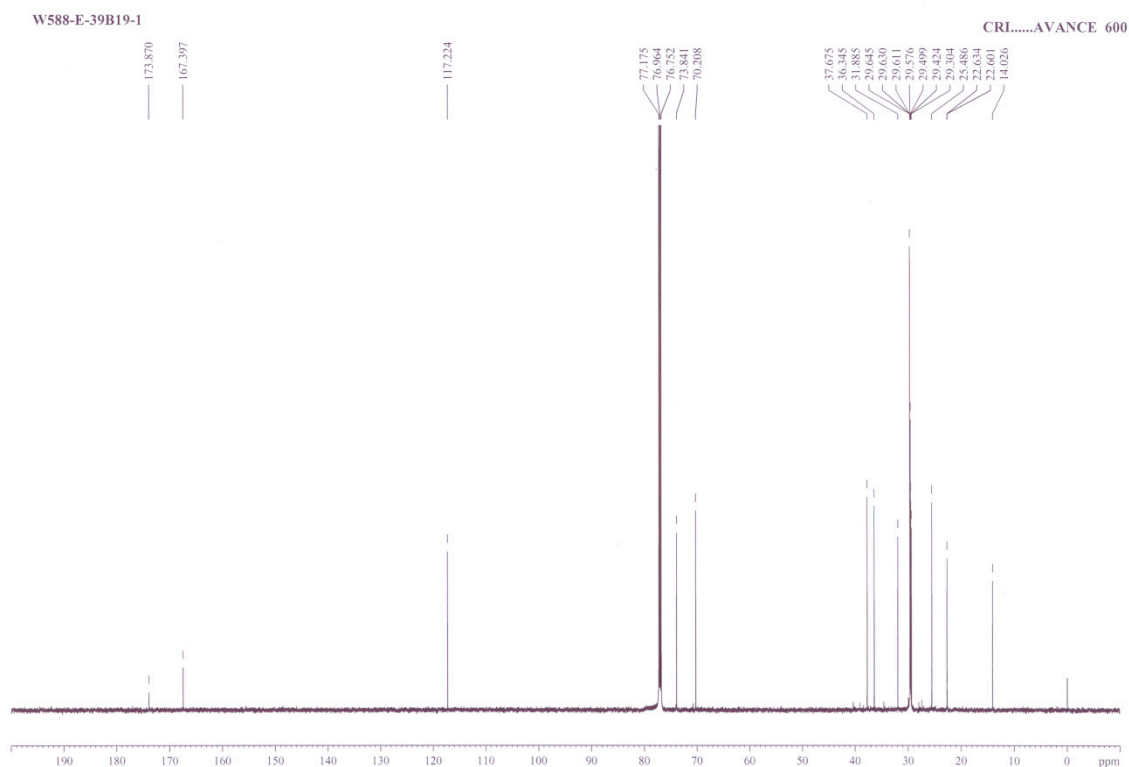

Figure S26.  $^{13}\text{C}$  NMR spectrum (150 MHz) of compound **6** in  $\text{CDCl}_3$

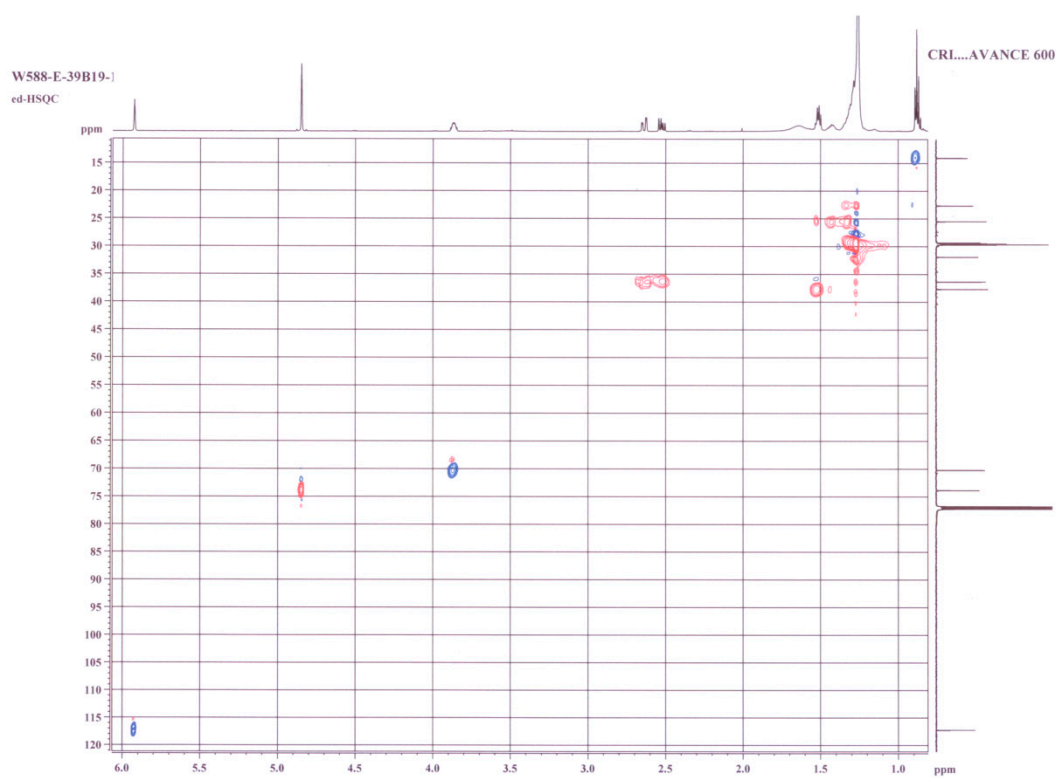

Figure S27. HSQC spectrum of compound **6** in  $\text{CDCl}_3$

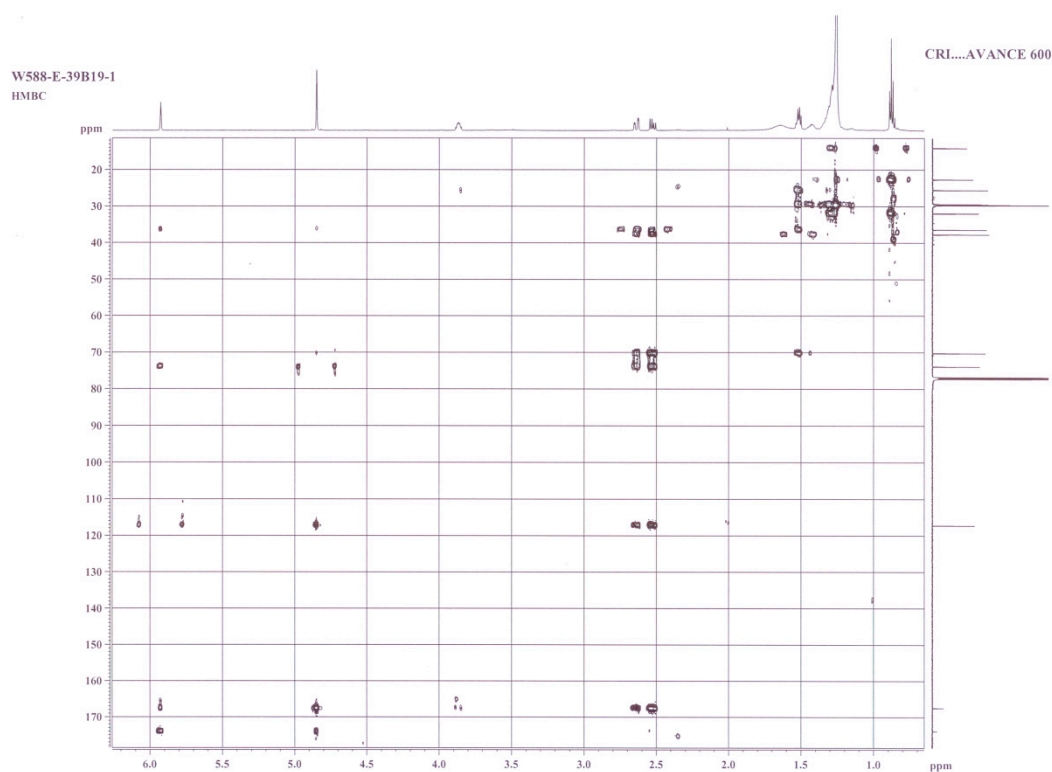

Figure S28. HMBC spectrum of compound **6** in  $\text{CDCl}_3$
